# Supplementary material for: Preparation, structure and analysis of the bonding in the molecular entity (OSO)2Li{[AlF(ORF)3]Li[Al(ORF)4]} (RF = C(CF3)3)
Source: Royal Society of Chemistry journal article supplement (doi:10.1039/b923291e), 2010-01-01
Supplement: b923291e.pdf [file b923291e.pdf]

## Supplemental information

for

### Preparation, Structure and Analysis of the Bonding in the Molecular Entity $(\text{OSO})_2\text{Li}\{[\text{AlF}(\text{OR}_F)_3]\text{Li}[\text{Al}(\text{OR}_F)_4]\}$ ( $\text{R}_F =$ $\text{C}(\text{CF}_3)_3$ ).

Grigory B. Nikiforov,<sup>[a]</sup> Jack Passmore\*,<sup>[a]</sup> J. Mikko Rautiainen,<sup>[a]</sup> T. Stanley Cameron<sup>[b]</sup>

\*Corresponding author.

[a] Department of Chemistry, University of New Brunswick, Fredericton, NB E3B 6E2, Canada,  
Tel.: + 1-(506) 453-48-21; Fax: + 1-(506) 453-49-81.

E-mail address: passmore@unb.ca (J. Passmore).

[b] Department of Chemistry, Dalhousie University, Halifax, NS B3H 4J3, Canada

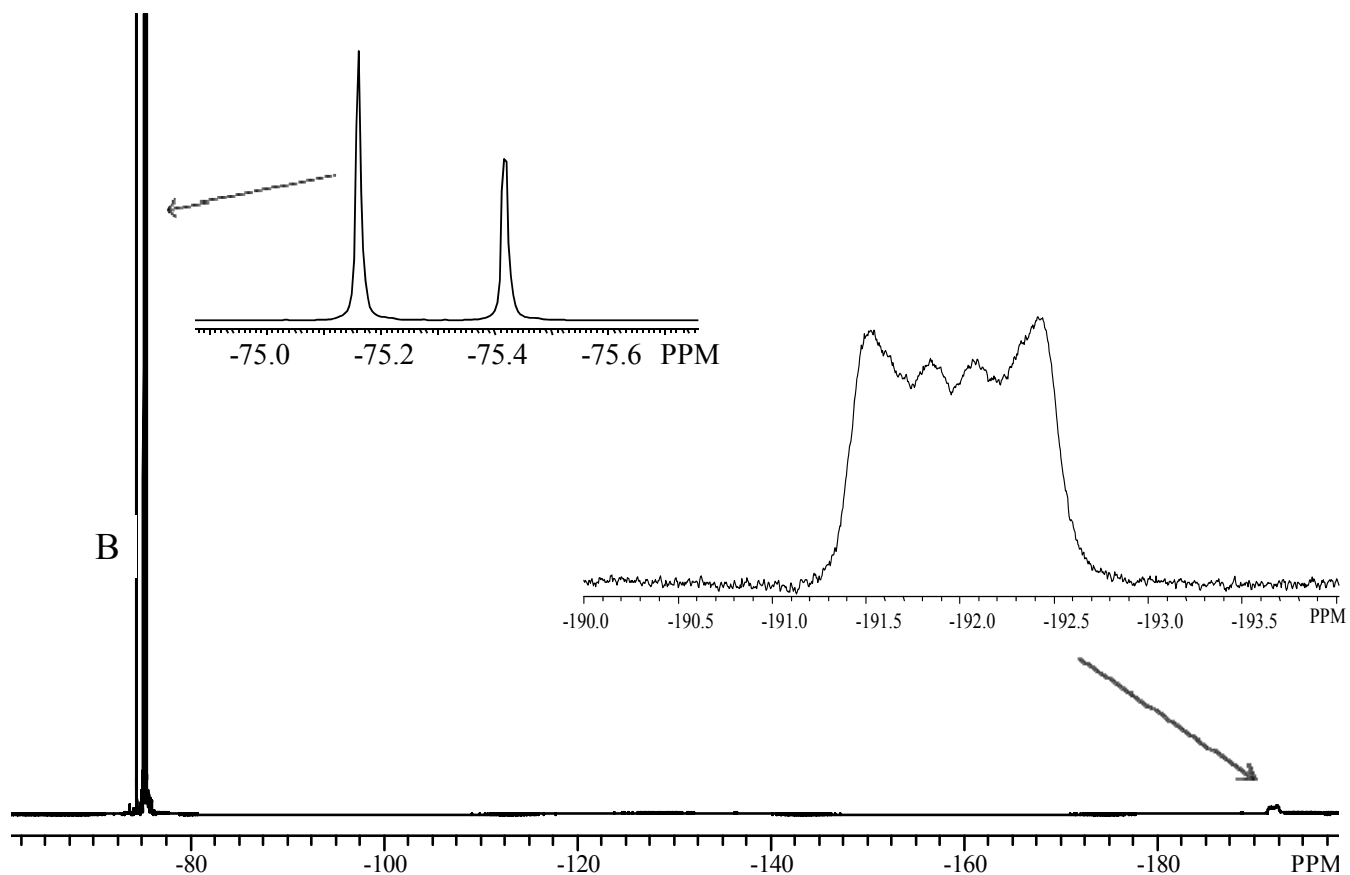

**Figure S1.**  $^{19}\text{F}$  NMR spectrum of **1** in  $\text{SO}_2$  at room temperature, **B** = minor impurity of  $\text{Li}[\text{Al}(\text{OC}(\text{CF}_3)_3)_4]$ . Relative intensities of three resonances of **A** = 36 : 28 : 1. Relative molar intensities of **A** : **B** = 100 : 16. Fine structure of resonance at -192 ppm has four components, separation between them are 122 Hz, 89 Hz, 122 Hz (from left to right).

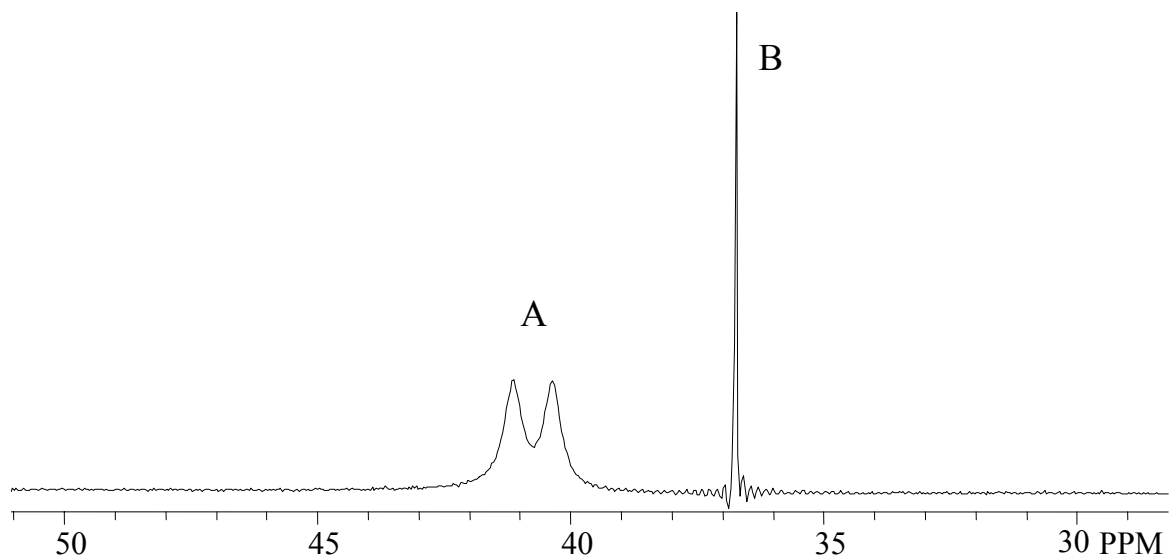

**Figure S2.**  $^{27}\text{Al}$  NMR spectrum of **1** in  $\text{SO}_2$  at room temperature, A = 1, B = impurity of  $\text{Li}[\text{Al}(\text{OC}(\text{CF}_3)_3)_4]$ . Relative intensities A : B = 100 : 19. Separation between two resonances of A is 80.0 Hz. The linewidth for two resonances of **1** is  $\Delta\omega_{1/2} = 51$  Hz and 50 Hz. Linewidth of B is  $\Delta\omega_{1/2} = 10$  Hz.

Notes and interpretation. The Al-F spin-spin coupling constant is reported only for one aluminum fluoride complex  $[\text{AlF}_4]^-$ .  $^{19}\text{F}$  NMR resonance of  $[\text{AlF}_4]^-$  is located at -194.2 ppm,  $J_{\text{Al-F}} = 37.8$  Hz;  $^{27}\text{Al}$  NMR resonance at 49.2 ppm,  $J_{\text{Al-F}} = 37.8$  Hz. The spin-spin coupling constants are equal in  $^{19}\text{F}$  and  $^{27}\text{Al}$  NMR spectra. Symmetry of environment of both aluminums in **1** is lower than tetrahedral, however separation of components of multiplet (-192.0 ppm) in  $^{19}\text{F}$  NMR spectrum and separation between two resonances of A in  $^{27}\text{Al}$  NMR spectra are not comparable. Therefore  $^{27}\text{Al}$  NMR resonances at 40.4 and 41.3 ppm are due to two magnetically non equivalent aluminums in **1** and not due to coupling Al-F. Fine structure of  $^{19}\text{F}$  NMR resonance may be due to spin-spin coupling of fluorine nuclei with the  $^{27}\text{Al}$  nuclei and  $^6\text{Li}$  and  $^7\text{Li}$  nuclei.

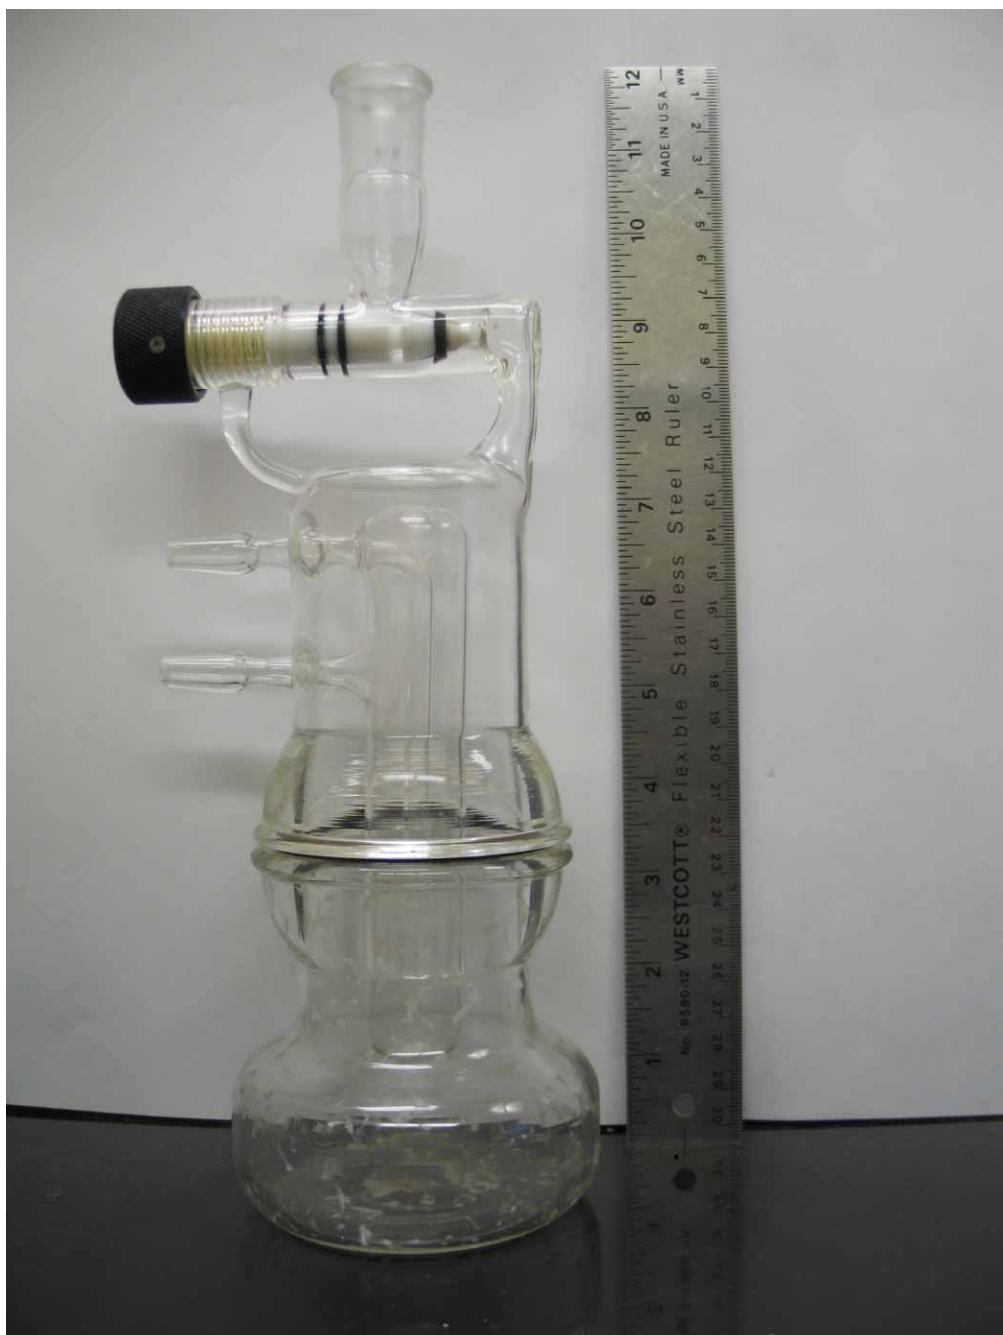

**Figure S3.** Sublimation vessel (Ace Glass Inc.) used for subliming Li[Al(OR<sub>F</sub>)<sub>4</sub>].
